# Supplementary material
Source: publisher figshare collection journal article supplement (https://acs.figshare.com/ndownloader/files/14886587)
Supplement: Supplementary file 1 [file 14886587]

# **Supporting Information**

## **for**

# **Na-Melt Synthesis of Fine Ni<sub>3</sub>Si Powders as a Hydrogenation Catalyst**

Hiroshi Itahara<sup>a,\*</sup>, Wiyanti F. Simanullang<sup>b</sup>, Naoko Takahashi<sup>a</sup>, Satoru Kosaka<sup>a</sup>, Shinya Furukawa<sup>b,c</sup>

<sup>a</sup>Toyota Central Research & Development Laboratories., Inc., 41-1 Yokomichi Nagakute, Aichi, 480-1192, Japan. \*E-mail: h-itahara@mosk.tytlabs.co.jp

<sup>b</sup>Institute for Catalysis, Hokkaido University, N21 W10, Kita-ku, Sapporo, 001-0021, Japan

<sup>c</sup>Elements Strategy Initiative for Catalysts and Batteries, Kyoto University, Katsura, Kyoto 615-8520, Japan

- (1) Procedures for synthesis, characterization and evaluation of catalytic activities
- (2) Measurement procedures of Ni dispersion, TOF (turn over frequency) and conversion rate of the prepared catalysts
- (3) Powder XRD pattern of a commercial Ni<sub>3</sub>Si (Ni<sub>3</sub>Si/Ni<sub>31</sub>Si<sub>12</sub>) powder
- (4) N<sub>2</sub> adsorption isotherm of Ni<sub>3</sub>Si (Ni<sub>3</sub>Si/Ni<sub>31</sub>Si<sub>12</sub>) powder (synthesized at 1123 K)
- (5) FE-SEM image and EDX spot analysis of the synthetic Ni<sub>3</sub>Si powder
- (6) SEM image and SEM-EDX mapping of the synthetic Ni<sub>3</sub>Si powder
- (7) XPS spectra of the Si 2p core level of commercial and synthetic Ni<sub>3</sub>Si powders
- (8) Details of the catalytic activities of Ni and Ni<sub>3</sub>Si

## (1) Procedures for synthesis, characterization and evaluation of catalytic activities

Predetermined amount of Ni (99.9 %, 2 ~ 3  $\mu\text{m}$ , Kojundo Chemical Lab.), Si (99.99 %, < 45  $\mu\text{m}$ , Kojundo Chemical Lab.) and Na (99.95%, Sigma-Aldrich Co. LLC.) were padded into a BN pot, and then packed in a stainless cell (inner volume of  $\sim 10\text{ cm}^3$ ) in Ar. The molar ratio of Ni : Si : Na was set as 3 : 1 : 2 (total amount of  $\sim 200\text{ mg}$ ). The cell was set in a furnace and then the temperature was raised to 873, 998 or 1123 K (heating rate of 300 K/h). After 2 h duration, the cells were furnace cooled to room temperature. The products were washed by 2-propanol, ethanol and then water in air. The samples after wash were dried in vacuum at 353 K for 2 h. **Caution!** *The order of washing solvent addition is important in order to prevent from combustion. Reaction of sodium and water is vigorous while that of sodium and alcohol with longer chain is more moderate.*

Crystalline phases were identified by powder X-ray diffraction (XRD; Rigaku RINT-TTR). The microstructure of the samples was observed by scanning electron microscopy (FE-SEM; Hitachi High-Technologies S-5500).  $\text{N}_2$  adsorption isotherm was measured (Nova 3000e instrument, Quantachrome Instruments). X-ray Photoelectron Spectroscopy (XPS) and Hard X-ray Photoelectron Spectroscopy (HAXPES) analysis were conducted as described below.

### <X-ray Photoelectron Spectroscopy (XPS)>

XPS (Quanterra SXM,, ULVAC PHI) spectra were measured for the sample after heat treatment under a 5%  $\text{H}_2/\text{Ar}$  flow ( $500\text{ mL min}^{-1}$ ) at 673 K for 0.5 h. XPS measurement was conducted with monochromatic Al  $\text{K}\alpha$  X-rays at 1486.6 eV, 14 kV and 1500 W. The base pressure was set below  $1 \times 10^{-7}\text{ Pa}$ . The diameter of detection were 400  $\mu\text{m}\Phi$ , the take-off angle (TOA) was 45°. Here, the surface normal corresponds to a TOA of 90°. The pass energy and the energy step were set at 29.35 eV and 0.125 eV, respectively.

### <Hard X-ray Photoelectron Spectroscopy (HAXPES)>

The Ni  $2\text{p}_{3/2}$  core level was determined by HAXPES measurements on the SPring-8 BL16XU beamline as described in the previous report [S1]. The photon energy was set at 7946.6 eV. The energies and angular distributions of the photoelectrons were assessed using a VG-Scienta R4000-HV hemispherical analyzer. The objective lens has an effective acceptance angle of approximately  $\pm 30^\circ$  and an angular resolution of  $1.32^\circ$ . The stability of the system was confirmed using the Au  $4\text{f}_{7/2}$  photoelectron peak for an Au film on a Si substrate. The overall stability of the photoelectron energy was found to be within 50 meV. The angular distributions of the photoelectrons were determined at photoelectron take-off angles at  $85^\circ$ . Here, a take-off angle perpendicular to the surface is defined as  $90^\circ$ . The analysis depths of the HAXPES

measurements were calculated according to the previous report. [S2]

Catalytic properties of hydrogenation of ethylene, acetylene, toluene and benzene were evaluated as follows. The mixture powder of  $\text{Ni}_3\text{Si}$  (synthesized at 1123 K, 10 mg) and quartz sand (Miyazaki Chemical Co., 250 ~ 420  $\mu\text{m}$ , 2 g) were filled into a quartz glass tube (inner diameter: 10 mm) and set in a fixed bed continuous flow reactor. Prior to the catalytic activity measurements, the catalyst was treated under  $\text{H}_2$  gas flow of 10 ml/min at 673 K for 0.5 h. Then, the catalytic activities of hydrogenation reactions were evaluated using the model gases (see, detail in (2) below) of (a) ethylene to ethane ( $\text{C}_2\text{H}_4 : \text{H}_2 : \text{He} = 10 : 10 : 30$  ml/min, 343 K), (b) acetylene to ethylene and ethane (acetylene:  $\text{H}_2 : \text{He} = 2 : 10 : 30$  ml/min, 423 K), (c) benzene to cyclohexane (benzene :  $\text{H}_2 : \text{He} = 0.7 : 5 : 10$  ml/min, 423 K) and (d) toluene to methyl-cyclohexane (toluene :  $\text{H}_2 : \text{He} = 0.2 : 5 : 10$  ml/min, 423 K). All the reactions were carried out under an atmospheric pressure. Benzene and toluene were supplied as saturated vapor at room temperature using a bubbler equipped upstream. The reference samples of commercial powders of  $\text{Ni}_3\text{Si}$  (30 mg, the  $\text{Ni}_3\text{Si}$  ingot were pulverized in argon glove box, < 45  $\mu\text{m}$ , Kojundo Chemical Lab.) and Ni (300 mg, < 150  $\mu\text{m}$ , FUJIFILM Wako Pure Chemical) were evaluated in the same manner.

- (2) Measurement procedures of Ni dispersion, TOF (turn over frequency) and reaction rate of the prepared catalysts

CO pulse chemisorption was performed using BELCAT II (Microtrac BEL) to estimate the Ni dispersion of the prepared catalysts. Prior to chemisorption, the catalyst was pretreated under a 5% H<sub>2</sub>/Ar flow (40 mL min<sup>-1</sup>) at 673 K for 0.5 h. After the reduction pretreatment, Helium (He) gas was introduced at the same temperature for 10 min to remove the chemisorbed hydrogen, followed by cooling to room temperature. A 10% CO/He pulse was introduced into the reactor, and the supplied CO flow was quantified downstream by a thermal conductivity detector.

Hydrogenation reactions of various hydrocarbons were conducted using a fixed bed flow reactor. The amount of the reactant and product in the outlet gas was measured using Gas Chromatography. Conversion was determined by the measured component ratios of (1) ethane (product) / ethylene (reactant), (2) ethylene + ethane / acetylene, (3) methyl cyclohexane / toluene and (4) cyclohexane / benzene.

TOF (turn over frequency) was determined using following equation:

$$\text{TOF (s}^{-1}\text{)} = \{P \times \text{FR} / (R \times T) \times C_v\} / \{D_p \times W \times X / M_{w_{\text{Ni}}}\}$$

P: Gas pressure (atm)

FR: Flow rate of the test gas (L s<sup>-1</sup>)

R: Gas constant (L atm K<sup>-1</sup> mol<sup>-1</sup>)

T: Temperature (K)

C<sub>v</sub>: Conversion (-)

D<sub>p</sub>: Dispersion of Ni (%)

W: Weight of catalyst (g)

M<sub>w<sub>Ni</sub></sub>: Molecular weight of Ni

X = Relative amount of Ni (-)

X for Ni = 1

X for Ni<sub>3</sub>Si = (Molecular weight of Ni × 3) / (Molecular weight of Ni<sub>3</sub>Si)

Reaction rate (mmol g<sup>-1</sup> s<sup>-1</sup>) was determined by the measured conversion (typically below 30%) and the weight of the catalyst.

- (3) Powder XRD pattern of a commercial  $\text{Ni}_3\text{Si}$  ( $\text{Ni}_3\text{Si}/\text{Ni}_{31}\text{Si}_{12}$ ) powder [Kojundo Chemical Lab., Particle size < 45  $\mu\text{m}$ ]:

The metallurgically prepared ingot was pulverized to powder in argon glove box.

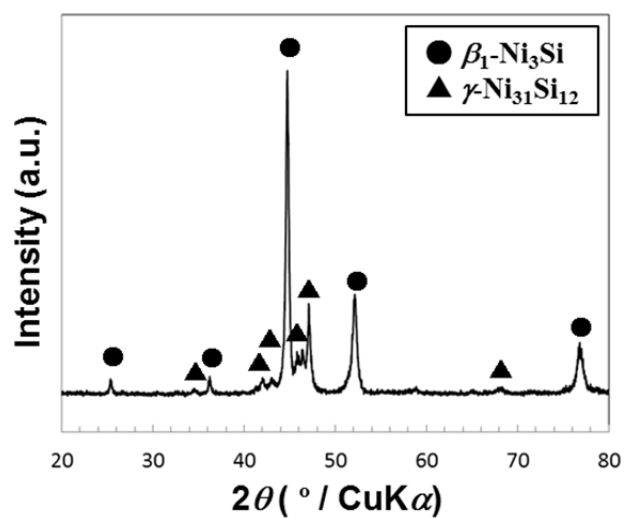

**Figure S1. Powder XRD pattern of commercial  $\text{Ni}_3\text{Si}$**

(4) N<sub>2</sub> adsorption isotherm of Ni<sub>3</sub>Si (Ni<sub>3</sub>Si/Ni<sub>31</sub>Si<sub>12</sub>) powder (synthesized at 1123 K)

BET specific surface area of 3.11 m<sup>2</sup>/g was derived from N<sub>2</sub> adsorption isotherm of the synthetic Ni<sub>3</sub>Si powder. We hypothesized that all particles were spherical with density of 8.04 g/cm<sup>3</sup> ( $\beta_1$ -Ni<sub>3</sub>Si) and then the average particle size of ~ 250 nm was deduced from the specific surface area (3.11 m<sup>2</sup>/g).

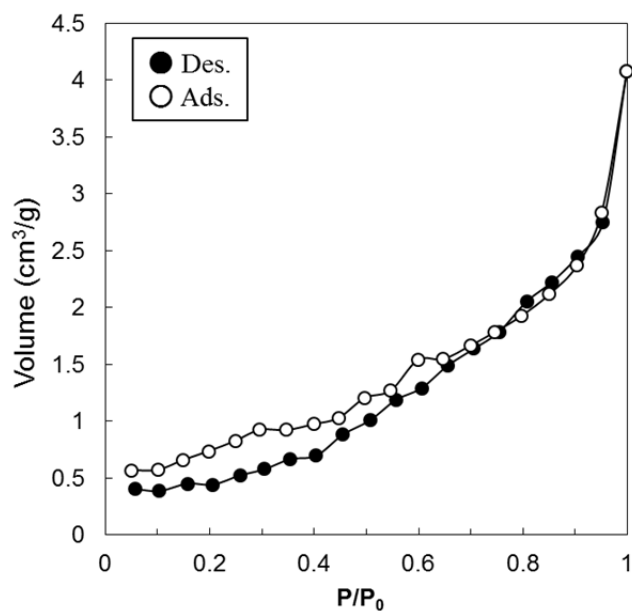

**Figure S2.** N<sub>2</sub> adsorption isotherm of Ni<sub>3</sub>Si powder

(5) FE-SEM image and EDX spot analysis of the synthetic  $\text{Ni}_3\text{Si}$  powder

EDX spot analysis data suggest that the primary particles have composition of Ni/Si of  $\sim 3/1$ .

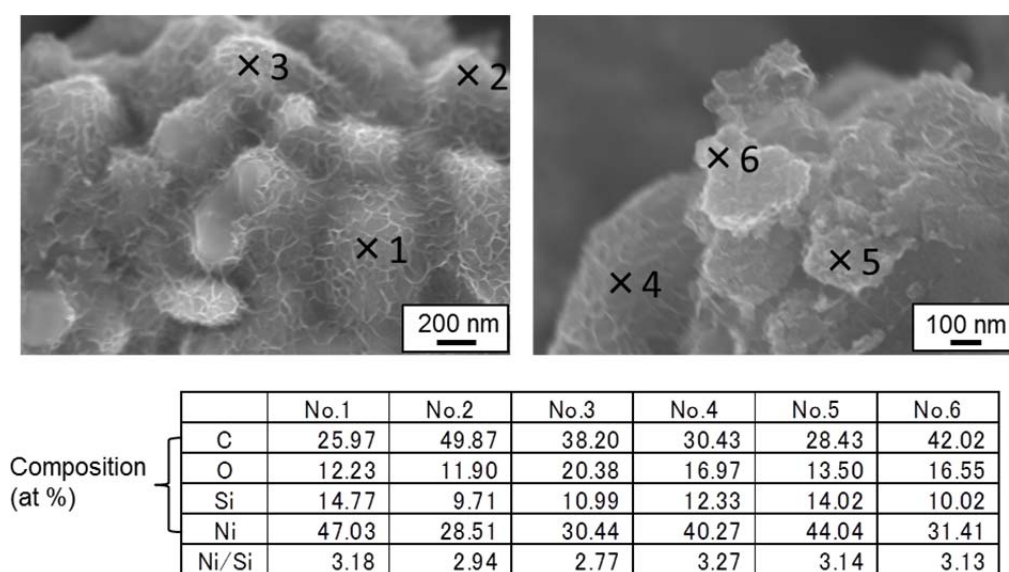

**Figure S3. FE-SEM images and EDX spot analysis for the synthesized  $\text{Ni}_3\text{Si}$  powder**

(6) SEM image and SEM-EDX mapping of the synthetic  $\text{Ni}_3\text{Si}$  powder

Ni and Si are rather homogeneously distributed over all of the powders. Some particles are Ni-rich, suggesting that a trace amount of unreacted Ni would exist while these unreacted phases were not detected by XRD (Fig.1 in the main text).

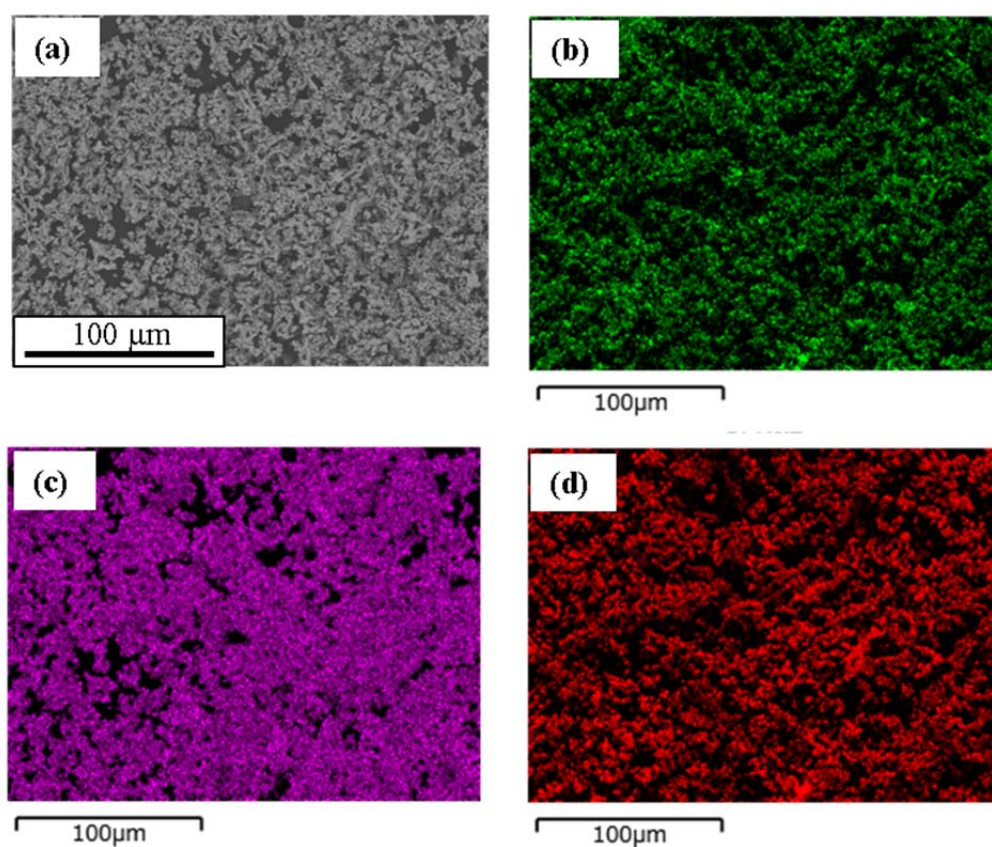

**Figure S4.** (a) SEM image and SEM-EDX mappings of (b) O, (c) Ni and (d) Si for  $\text{Ni}_3\text{Si}$  powder (synthesized at 1123 K).



(7) XPS spectra of the Si 2p core level of commercial and synthetic  $\text{Ni}_3\text{Si}$  powder

As shown in Figure S5, the synthesized  $\text{Ni}_3\text{Si}$  powder had lower intensity of the peak corresponding to Si-O when compared to commercial  $\text{Ni}_3\text{Si}$  powder.

It is expected that the oxygen in the raw powder or possible unreacted Si was removed by washing because they dissolved in alcohol and water as Na-Si-O or Na-Si. Thus, the synthetic  $\text{Ni}_3\text{Si}$  had a small amount of oxides.

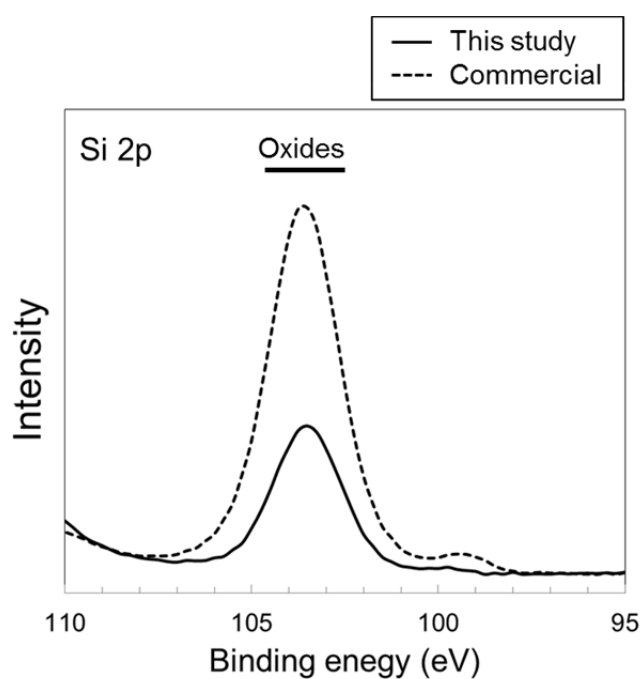

**Figure S5.** XPS spectra of the Si 2p core level of commercial and synthetic  $\text{Ni}_3\text{Si}$  powder

(8) Details of the catalytic activities of Ni and Ni<sub>3</sub>Si

**Table S1. Catalytic activities of Ni and Ni<sub>3</sub>Si in hydrogenation of various hydrocarbons**

| Reactant  | Temp.<br>(K) | Catalyst*                          | Dispersion<br>(%) | Amount<br>(mg) | Conv.<br>(%) | TOF<br>(s <sup>-1</sup> ) | Relative activity** |      |
|-----------|--------------|------------------------------------|-------------------|----------------|--------------|---------------------------|---------------------|------|
|           |              |                                    |                   |                |              |                           | Rate                | TOF  |
| ethylene  | 343          | Ni <sub>3</sub> Si                 | 0.0239            | 10             | 25.0         | 17.8                      | 20.3                | 8.6  |
|           | 343          | Ni <sub>3</sub> Si<br>(Commercial) | 0                 | 30             | 0.0          | 0.0                       | 0.0                 | 0.0  |
|           | 343          | Ni<br>(Commercial)                 | 0.0652            | 300            | 37           | 2.1                       | 1.0                 | 1.0  |
| acetylene | 423          | Ni <sub>3</sub> Si                 | 0.0239            | 30             | 6            | 1.4                       | 20.0                | 8.5  |
|           | 423          | Ni<br>(Commercial)                 | 0.0652            | 100            | 1            | 0.2                       | 1.0                 | 1.0  |
| toluene   | 423          | Ni <sub>3</sub> Si                 | 0.0239            | 30             | 23           | 7.5                       | 38.3                | 16.3 |
|           | 423          | Ni<br>(Commercial)                 | 0.0652            | 300            | 6            | 0.5                       | 1.0                 | 1.0  |
| benzene   | 423          | Ni <sub>3</sub> Si                 | 0.0239            | 30             | 12           | 12.8                      | 10.0                | 6.4  |
|           | 423          | Ni<br>(Commercial)                 | 0.0652            | 200            | 8            | 2.0                       | 1.0                 | 1.0  |

\* Ni<sub>3</sub>Si: synthesized at 1123K, Ni<sub>3</sub>Si (Commercial): see section (3) in the supporting information.

\*\*The catalytic activities (reaction rate or turnover frequency (TOF)) of Ni<sub>3</sub>Si were the relative values to those of commercial Ni (*i.e.*, relative activity of Ni =1).

## References

- [S1] E. Ikenaga, M.Kobata, H.Matsuda, T. Sugiyama, H.Daimon and K. Kobayashi, *J. Electron Spectrosc. Relat. Phenom.*, 2013, 190, 180.
- [S2] S. Tanuma, C. J. Powell and D. R. Penn, *Surf. Interface Anal.*, 1988, 11, 577.
